# Supplementary material for: Molecular dynamics simulation of the conductivity mechanism of nanorod filled polymer nanocomposites
Source: Royal Society of Chemistry journal article supplement (doi:10.1039/c5cp01953b), 2015-01-01
Supplement: c5cp01953b1.pdf [file c5cp01953b1.pdf]

## Supporting Information

### **Molecular dynamics simulation of the conductivity mechanism of nanorod filled polymer nanocomposites**

Yangyang Gao<sup>1</sup>, Dapeng Cao<sup>4</sup>, Jun Liu<sup>1\*</sup>, Jianxiang Shen<sup>1</sup>, Youping Wu<sup>1</sup>, Liquan Zhang<sup>1, 2, 3, 4\*</sup>

<sup>1</sup>Key Laboratory of Beijing City on Preparation and Processing of Novel Polymer Materials,  
People's Republic of China

<sup>2</sup>Beijing Engineering Research Center of Advanced Elastomers, People's Republic of China

<sup>3</sup>Engineering Research Center of Elastomer Materials on Energy Conservation and Resources,  
Ministry of Education, PRC

<sup>4</sup>State Key Laboratory of Organic-Inorganic Composites, Beijing University of Chemical  
Technology, 100029 Beijing, People's Republic of China

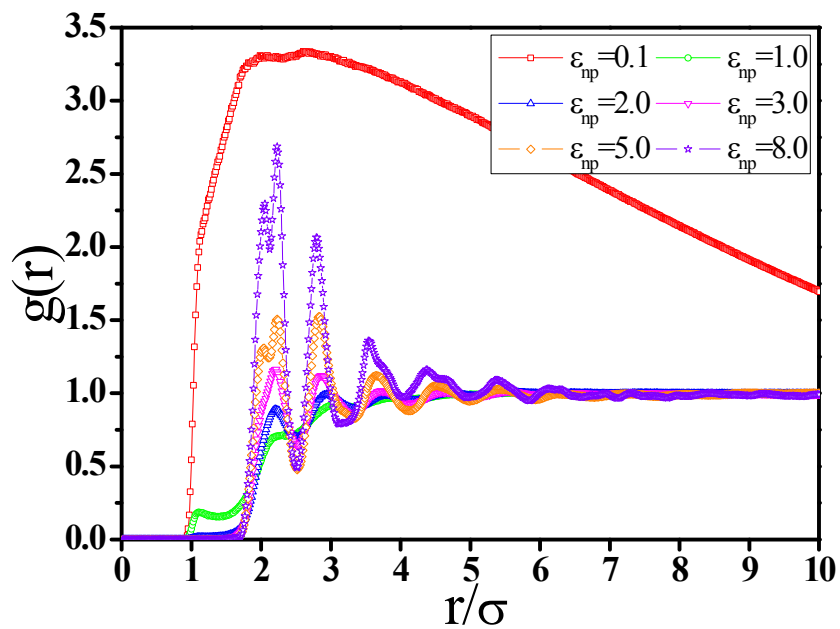

Fig. S1 RDF of nanorods for different polymer-nanorod interactions  $\varepsilon_{np}$ . ( $T=1.0$ ,  $\varphi = 4.49\%$ )

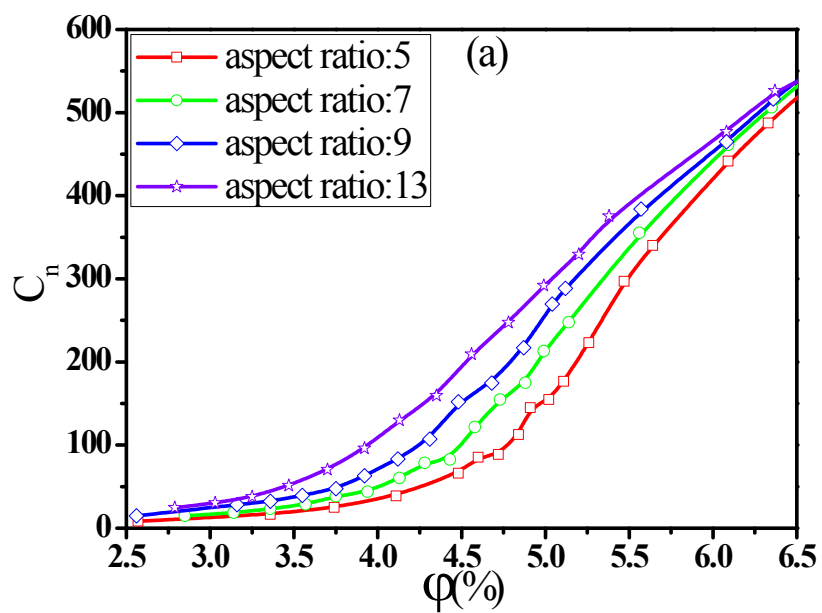

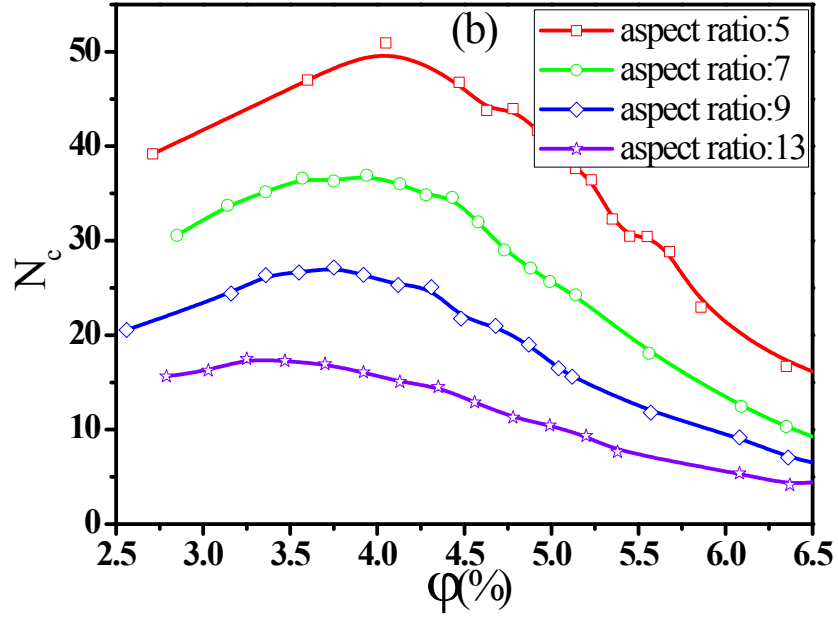

Fig. S2(a) The maximum cluster size  $C_n$ , (b) The total number of clusters  $N_c$  as a function of the volume fraction  $\phi$  of nanorods for different aspect ratios. ( $T=1.0$ ,  $\varepsilon_{np}=1.0$ )

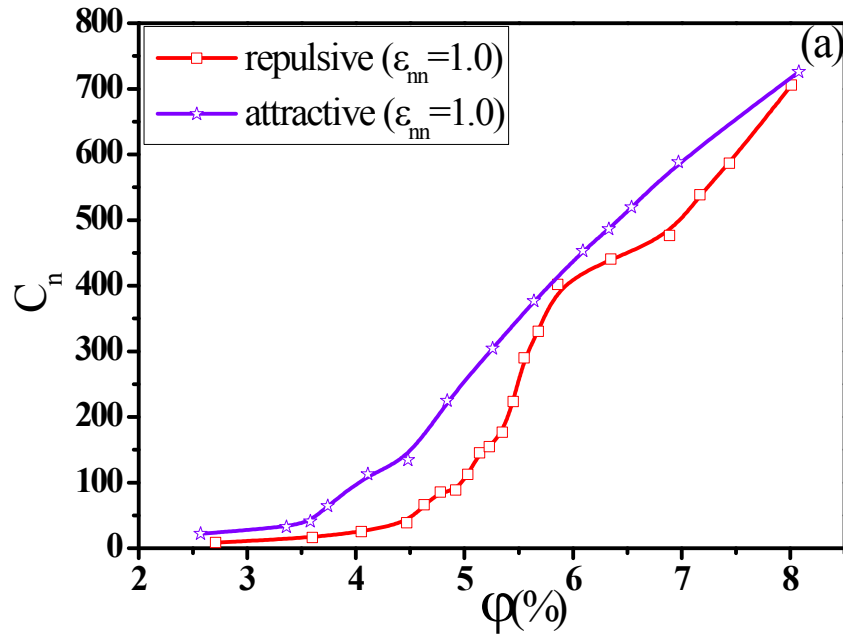

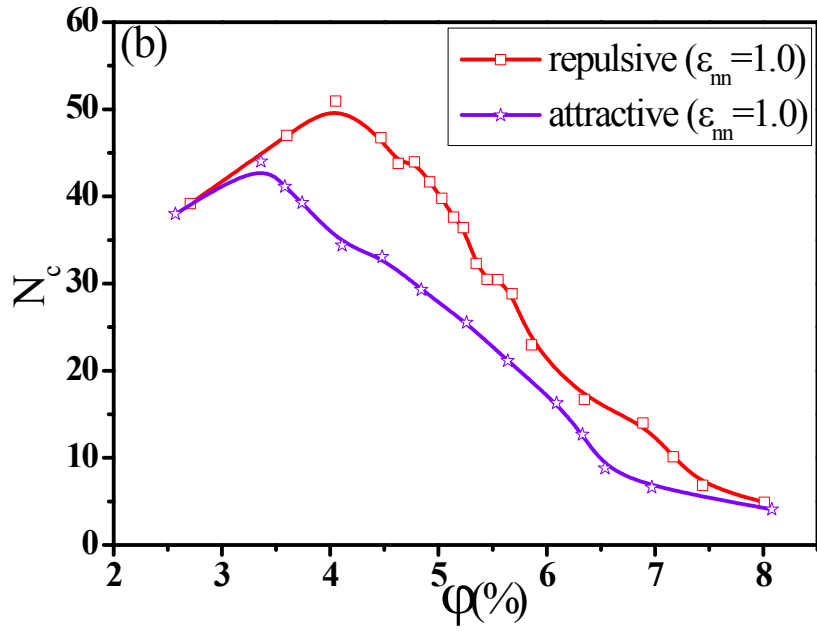

Fig. S3(a) The maximum cluster size  $C_n$ , (b) The total number of clusters  $N_c$  as a function of the volume fraction  $\phi$  of nanorods for repulsive and attractive filler-filler interaction  $\varepsilon_{nn}$ . ( $T=1.0$ ,  $\varepsilon_{np}=1.0$ )

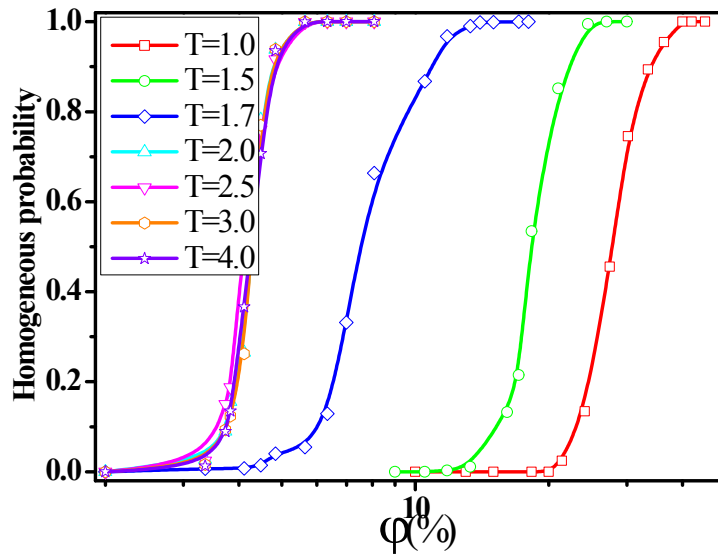

Fig. S4 Homogeneous probability as a function of the volume fraction  $\phi$  of nanorods for different temperatures  $T$ . ( $\varepsilon_{np}=0.1$ )

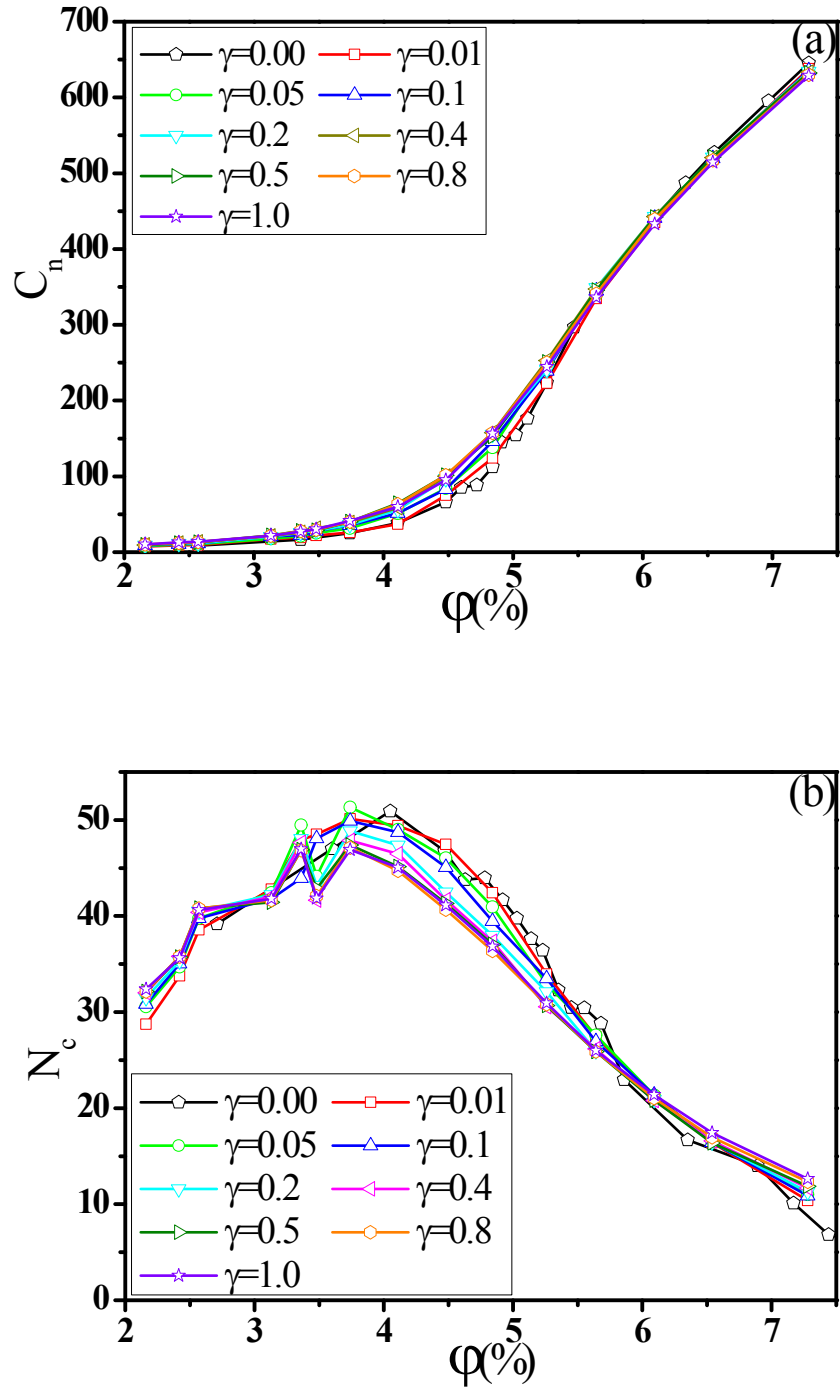

Fig. S5(a) The maximum cluster size  $C_n$ , (b) The total number of clusters  $N_c$  as a function of the volume fraction  $\phi$  of nanorods for different shear rates  $\gamma$ . ( $T=1.0$ ,  $\varepsilon_{np}=1.0$ )

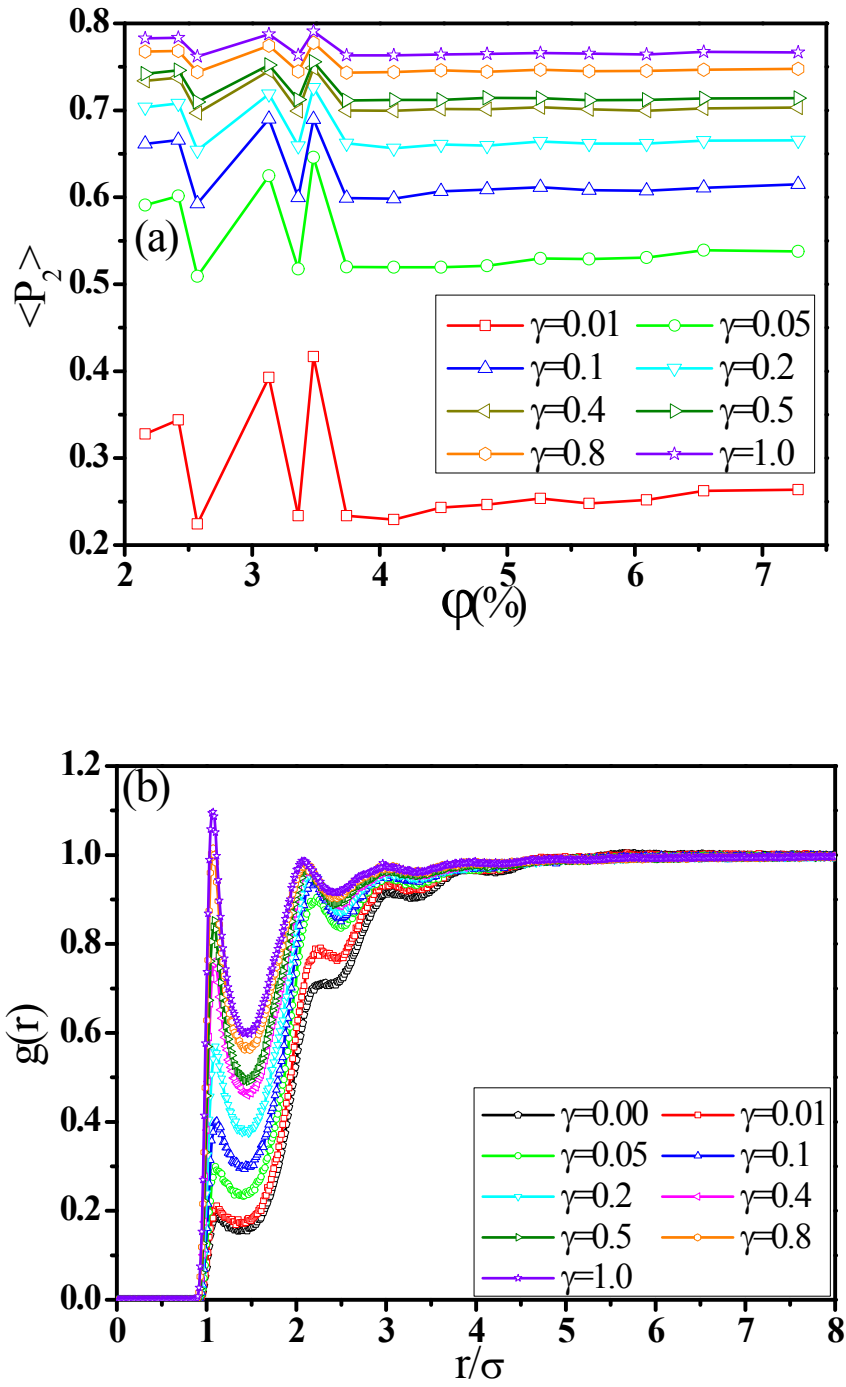

Fig. S6(a) The second-order Legendre polynomials  $\langle P_2(\cos \theta(t)) \rangle$  as a function of the volume fraction  $\phi$  of nanorod. (b) RDF of nanorods for different shear rates  $\gamma$ . ( $T=1.0$ ,  $\varepsilon_{np}=1.0$ )

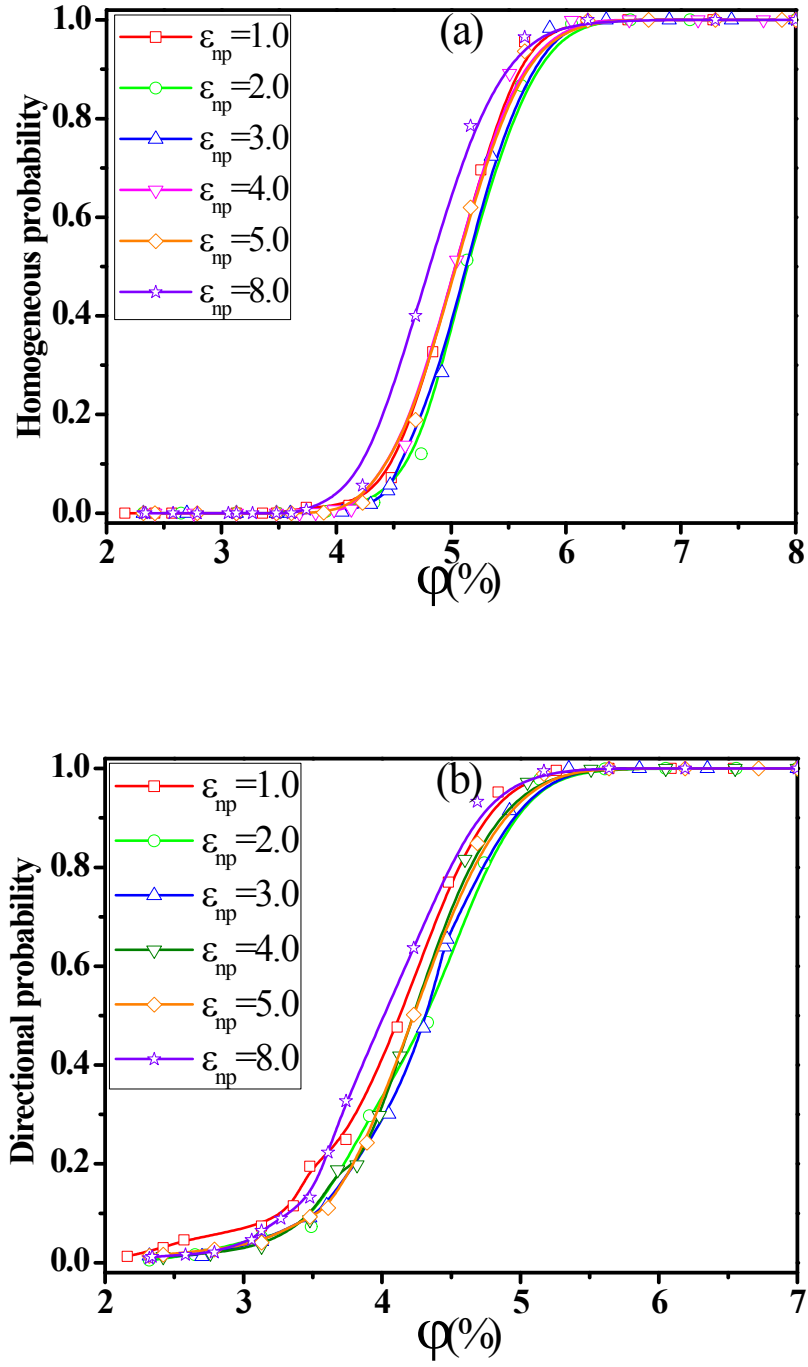

Fig. S7(a) Homogeneous probability and (b) directional probability of PNC as a function of the volume fraction  $\phi$  of nanorods for different interfacial strengths  $\epsilon_{np}$ . ( $T=1.0$ ,  $\gamma = 0.1$ )

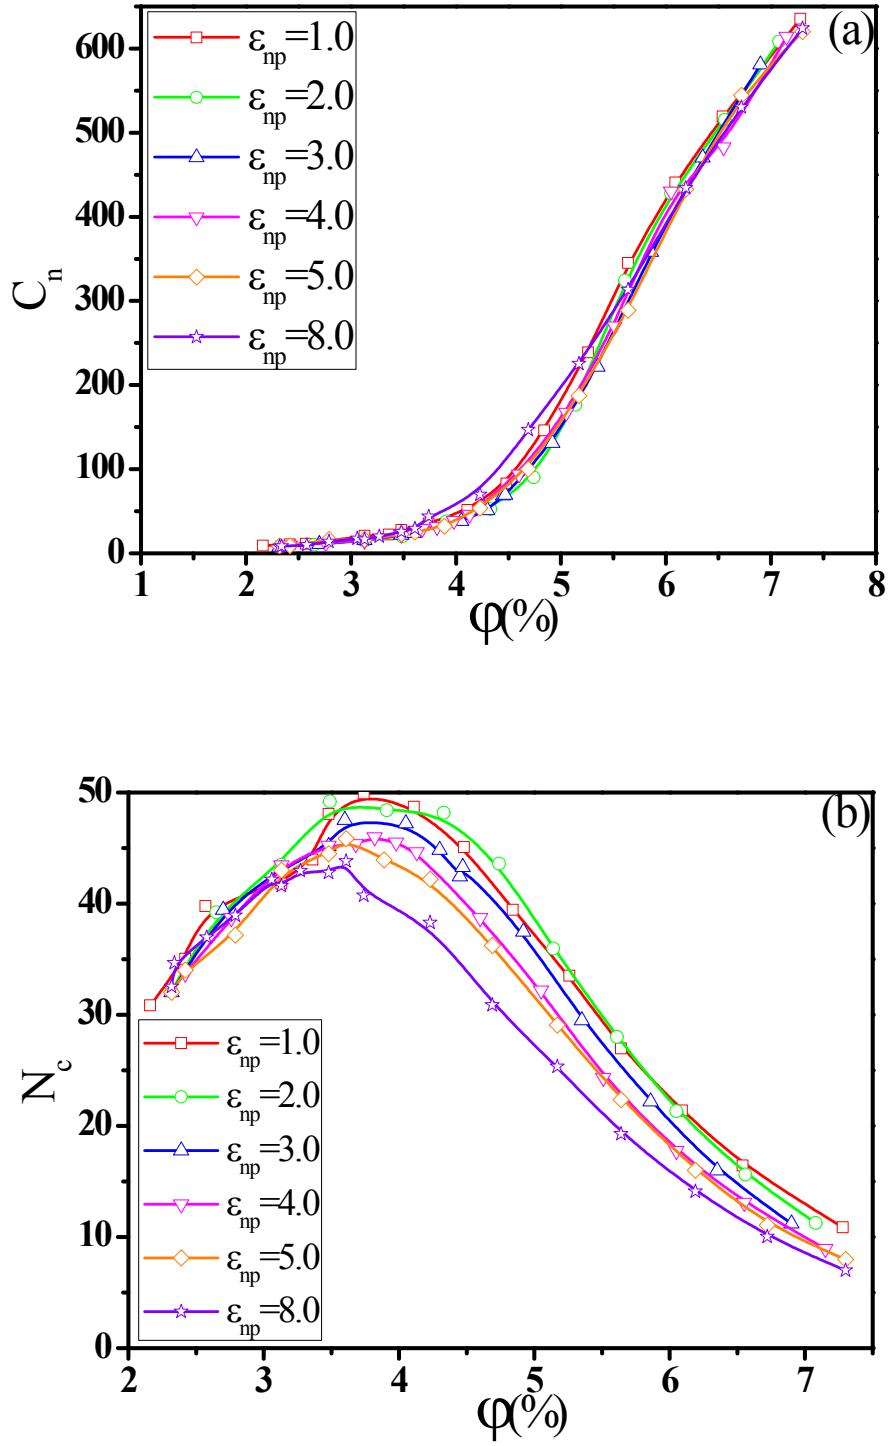

Fig. S8(a) The maximum cluster size  $C_n$ , (b) The total number of clusters  $N_c$  as a function of the volume fraction  $\phi$  of nanorods for different interfacial strengths  $\epsilon_{np}$ . ( $T=1.0$ ,  $\gamma = 0.1$ )



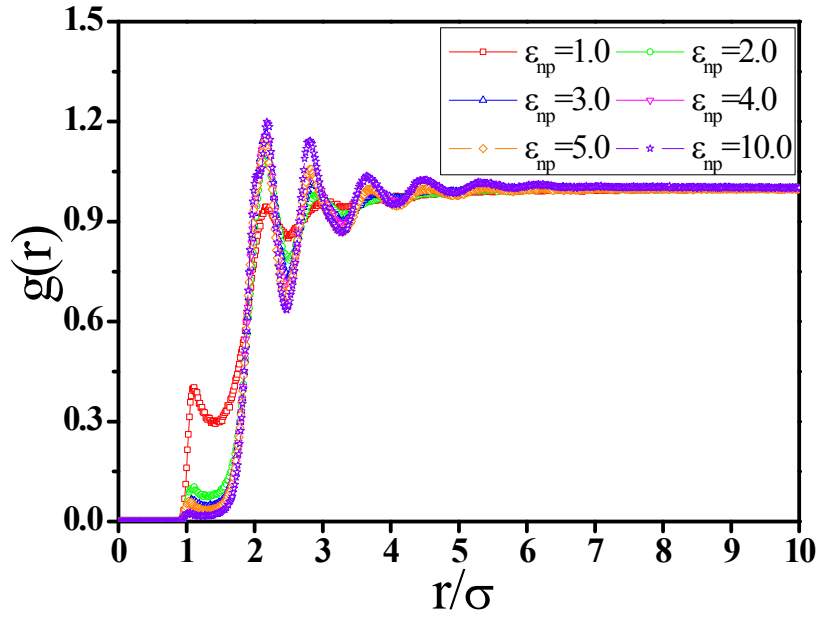

Fig. S9 RDF of nanorods for different interfacial interactions  $\varepsilon_{np}$ . ( $T=1.0$ ,  $\gamma=0.1$ )

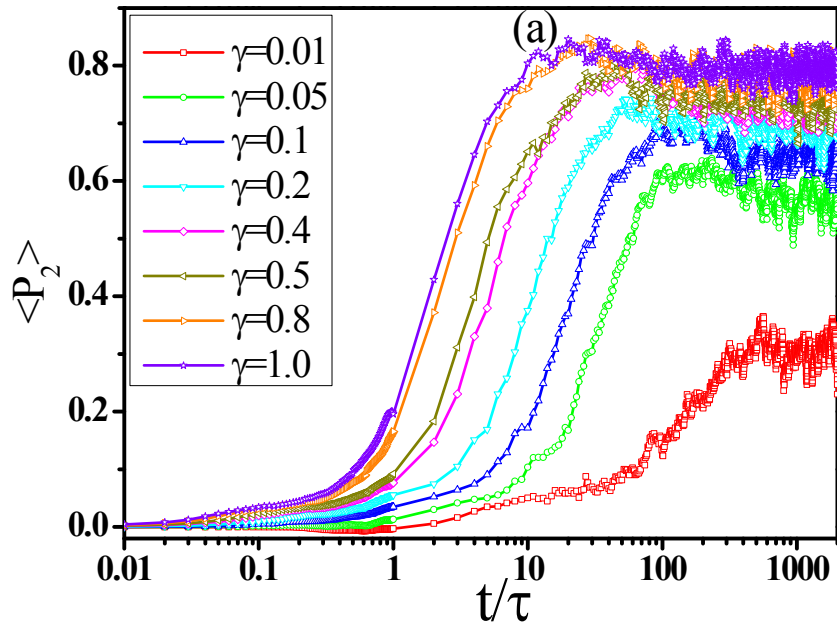

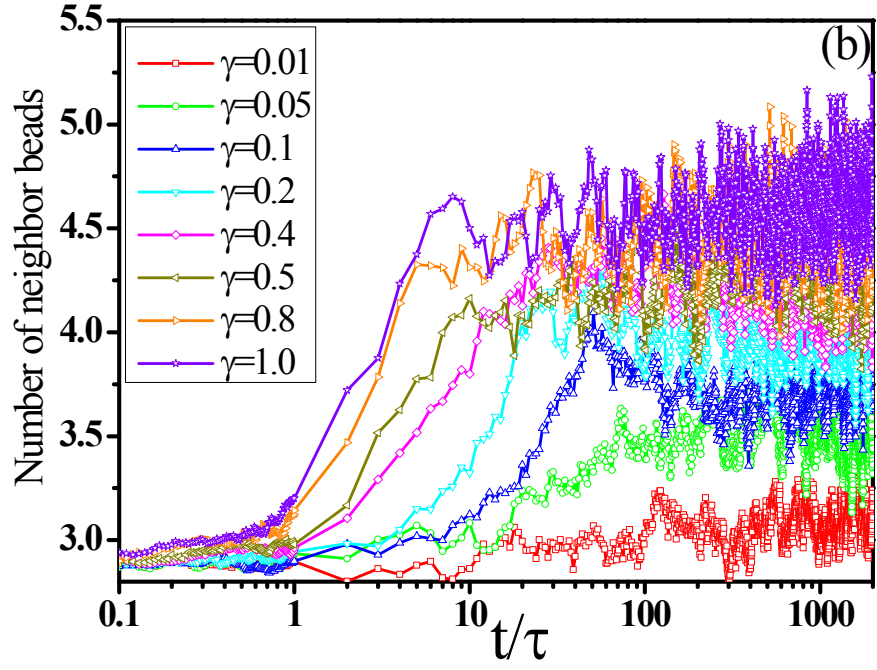

Fig. S10 The change of (a) the coordination number and (b) the second-order Legendre polynomials  $\langle P_2 \rangle$  as a function of the shear time  $t$  for different shear rates  $\dot{\gamma}$ . ( $T=1.0$ ,  $\varepsilon_{np} = 1.0$ ,  $\varphi = 4.49\%$ )

Here we calculated the rotational diffusivity  $D_{\text{rot}}$  and the rotational Peclet number  $\text{Pe}_{\text{rot}}$

( $\text{Pe}_{\text{rot}} = \frac{\gamma}{D_{\text{rot}}}$ ). As shown in Fig. S11(a), for the case of  $\varepsilon_{np} = 1.0$ , the rotational

diffusivity  $D_{\text{rot}}$  increases with the shear rate, while the effect of the volume fraction is

little because of low interfacial interaction. And  $D_{\text{rot}}$  decreases significantly with the

increase of the interfacial interaction shown in Fig. S11(b) because stronger

interaction can inhibit the mobility of nanorods. From Fig. S12(a), the values of  $\text{Pe}_{\text{rot}}$

for different volume fractions are nearly the same, while they increase with the shear

rate. Meanwhile, the percolation threshold of the directional conductivity also

increases with the shear rate, which is similar to the trend of  $\text{Pe}_{\text{rot}}$ . From Fig. S12(b),

the effect of the interfacial interaction on  $\text{Pe}_{\text{rot}}$  is small except the case  $\varepsilon_{np} = 1.0$ . This

is consistent with the percolation threshold of conductivity for different interactions.

The reason why  $\text{Pe}_{\text{rot}}$  is low at the case  $\varepsilon_{np} = 1.0$  results from the fact that some

nanorods aggregate directly (the peak at  $r = 2\sigma$  in Fig. S9), which leads to the low

rotational diffusivity  $D_{\text{rot}}$ . And for other interfacial interactions, nanorods do not

aggregate directly.

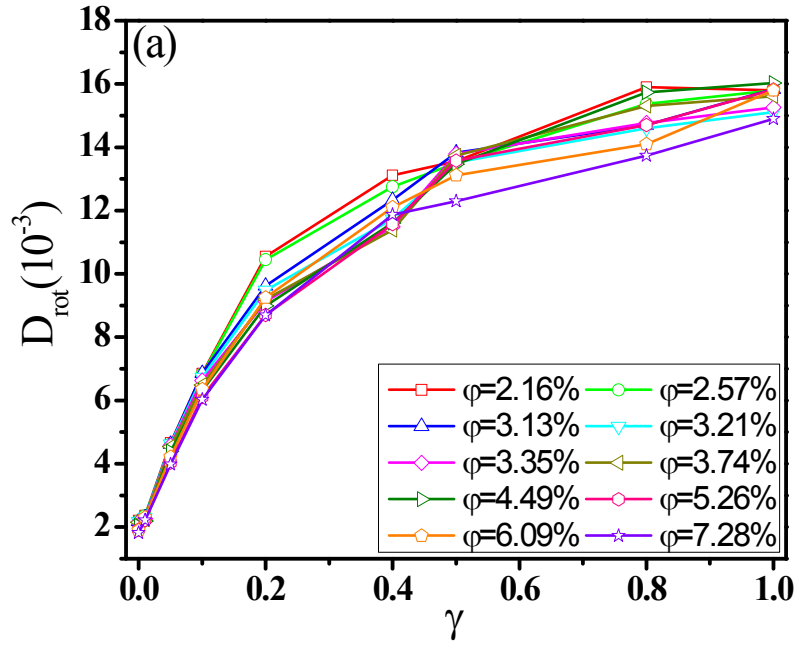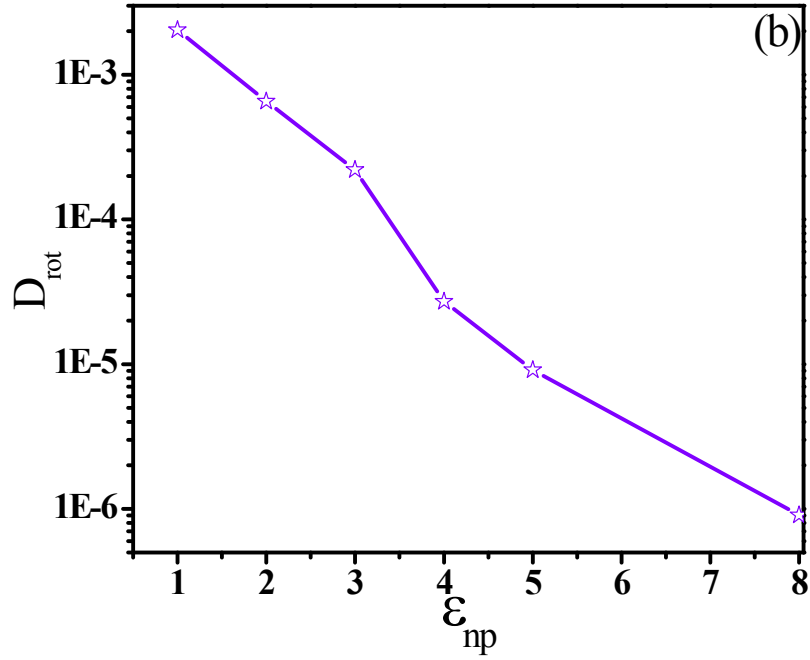

Fig. S11 The rotational diffusivity  $D_{\text{rot}}$  as a function of (a) shear rate  $\gamma$  for different volume fractions  $\varphi$  ( $\varepsilon_{np}=1.0$ ) and (b) the interfacial interaction  $\varepsilon_{np}$  ( $\gamma=0.0$ ,  $\varphi=4.49\%$ ). ( $T=1.0$ )

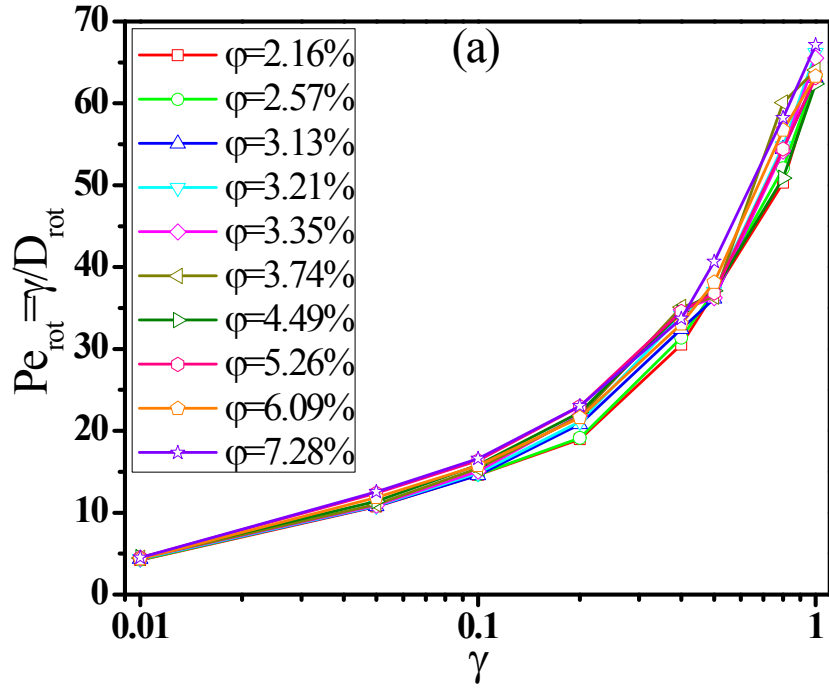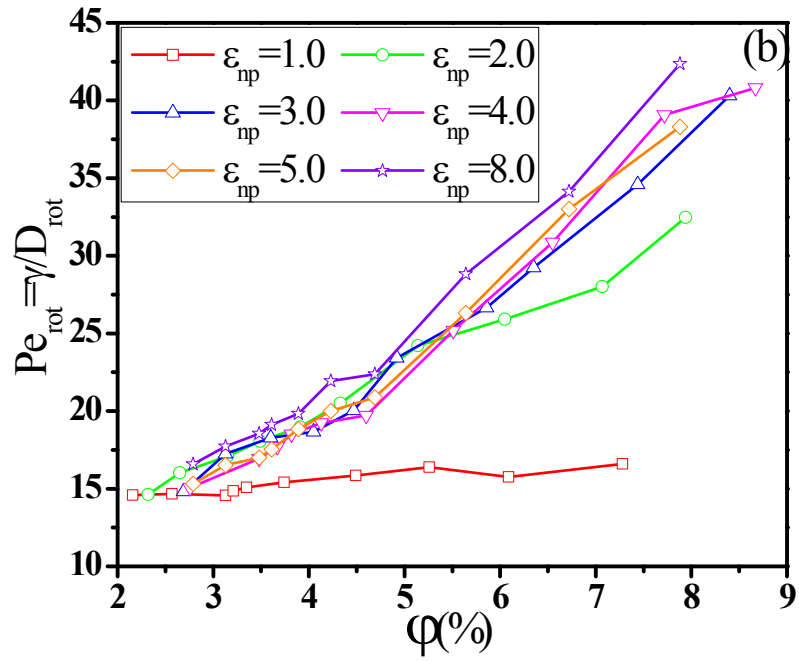

Fig. S12 The rotational Peclet number (a) as a function of shear rate  $\gamma$  for different volume fractions  $\phi$  ( $\epsilon_{np}=1.0$ ). (b) as a function of the volume fraction  $\phi$  for different interfacial interaction  $\epsilon_{np}$  with  $\gamma=0.1$ . ( $T=1.0$ )

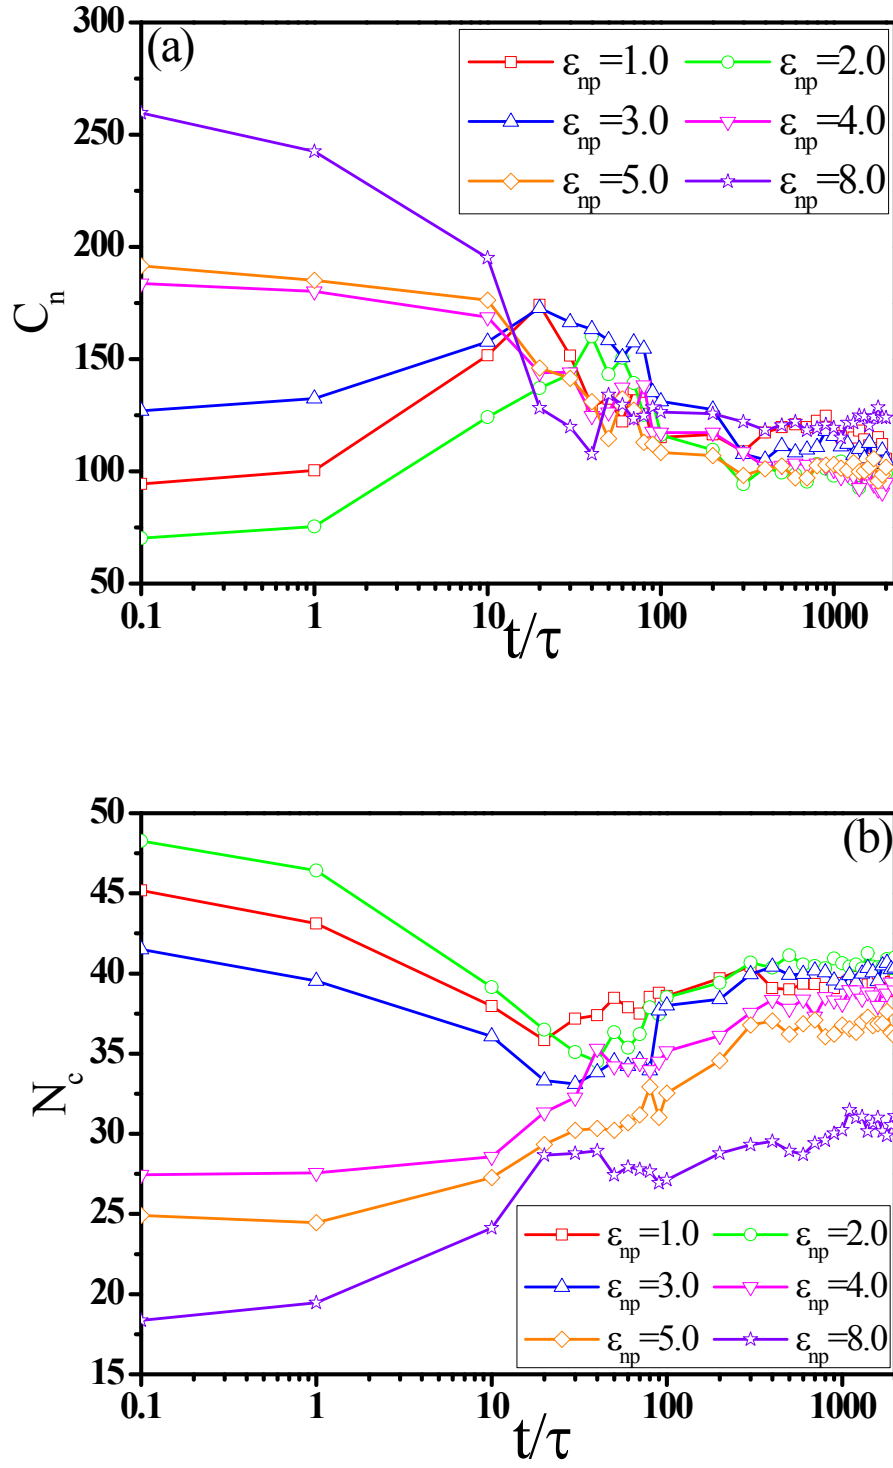

Fig. S13(a) The maximum cluster size  $C_n$ , (b) The total number of clusters  $N_c$  as a function of the shear time  $t$  for different interfacial strengths  $\varepsilon_{np}$ . ( $T=1.0$ ,  $\gamma = 0.1$ ,  $\varphi = 4.49\%$ )
